# Supplementary material
Source: publisher figshare collection journal article supplement (https://acs.figshare.com/ndownloader/files/24504051)
Supplement: Supplementary file 1 [file 24504051]

## **Supporting Information**

### **Pressure sensitive adhesive with controllable adhesion for fabrication of ultrathin soft devices**

Yun Hee Ju,<sup>1</sup> Hee-Jin Lee,<sup>2</sup> Chul Jong Han,<sup>2</sup> Cheul-Ro Lee,<sup>1</sup> Youngmin Kim,<sup>2,\*</sup> and Jong-Woong Kim<sup>1,\*</sup>

<sup>1</sup>School of Advanced Materials Engineering, Jeonbuk National University, 567 Baekje-daero, Deokjin-gu, Jeonju 54896, Republic of Korea

<sup>2</sup>Display Research Center, Korea Electronics Technology Institute, 25 Saenariro, Bundang-gu, Seongnam 13509, Republic of Korea

#### **Corresponding Author**

\*J.-W. K.: Tel: +82 63 270 2292, E-mail address: wyjd@jbnu.ac.kr

\*Y. K.: Tel: +82 31 789 7432, E-mail address: ymkim@keti.re.kr

**KEYWORDS:** pressure sensitive adhesive; ultraflexible; electrode; polyethylene terephthalate; Ag nanowire

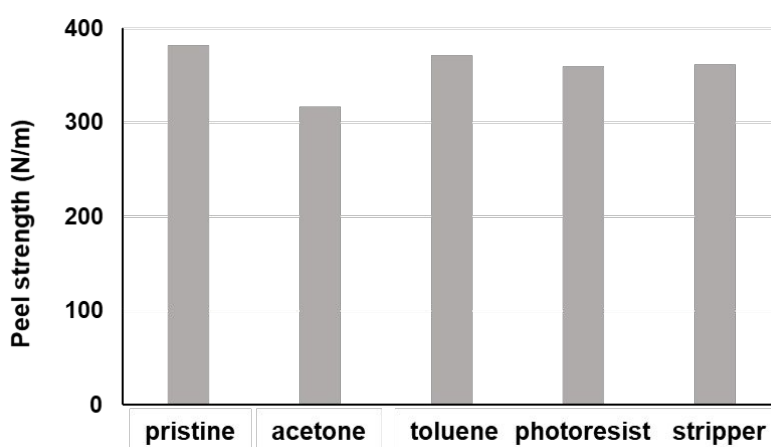

**Figure S1.** The peel strength of PSA-1 tape before and after solvent treatment. As the developing and stripping processes for photolithography need less than 1 min, the PSA-1 tape adhered to a SUS plate was immersed in the various solvents for 1 min and subject to 180° peel test. The little change in peel strength after solvent treatment means that PSA-1 tape is compatible with the photolithography process.

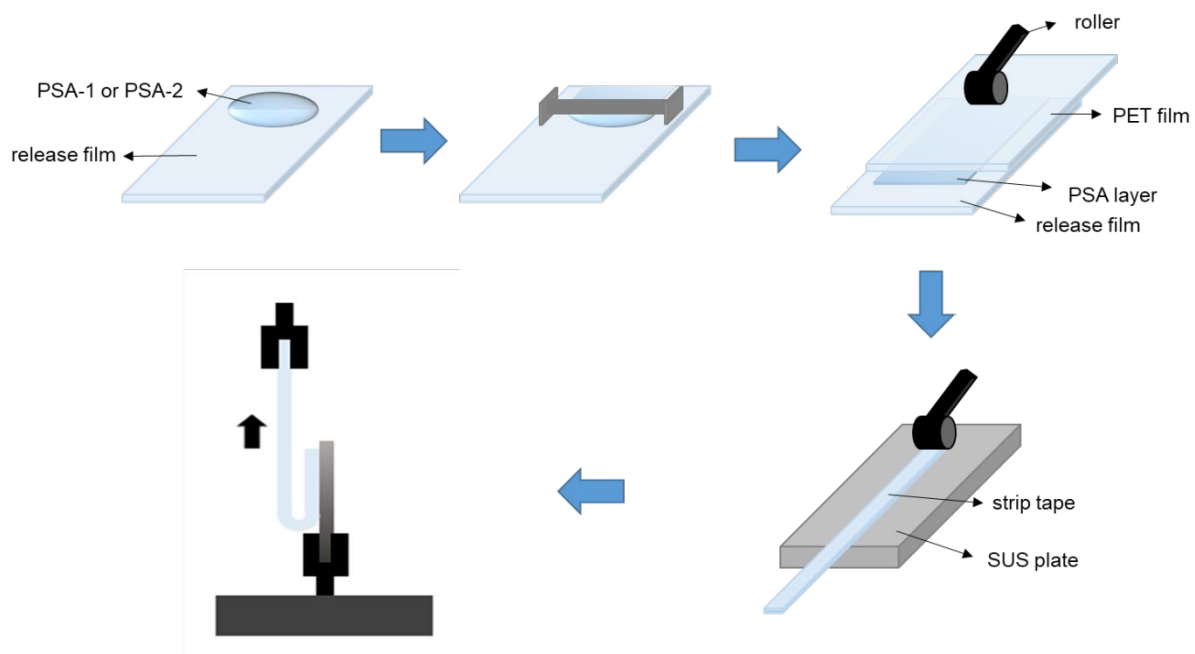

**Figure S2.** The schematic for the peel strength test.

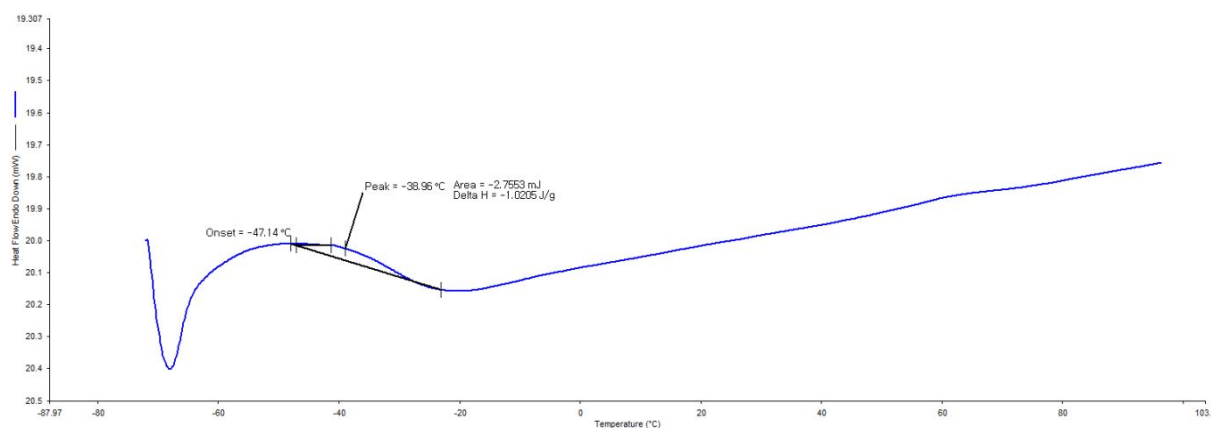

**Figure S3.** A DSC graph of polymer **1** obtained by increasing the temperature from -70 to 100 °C.

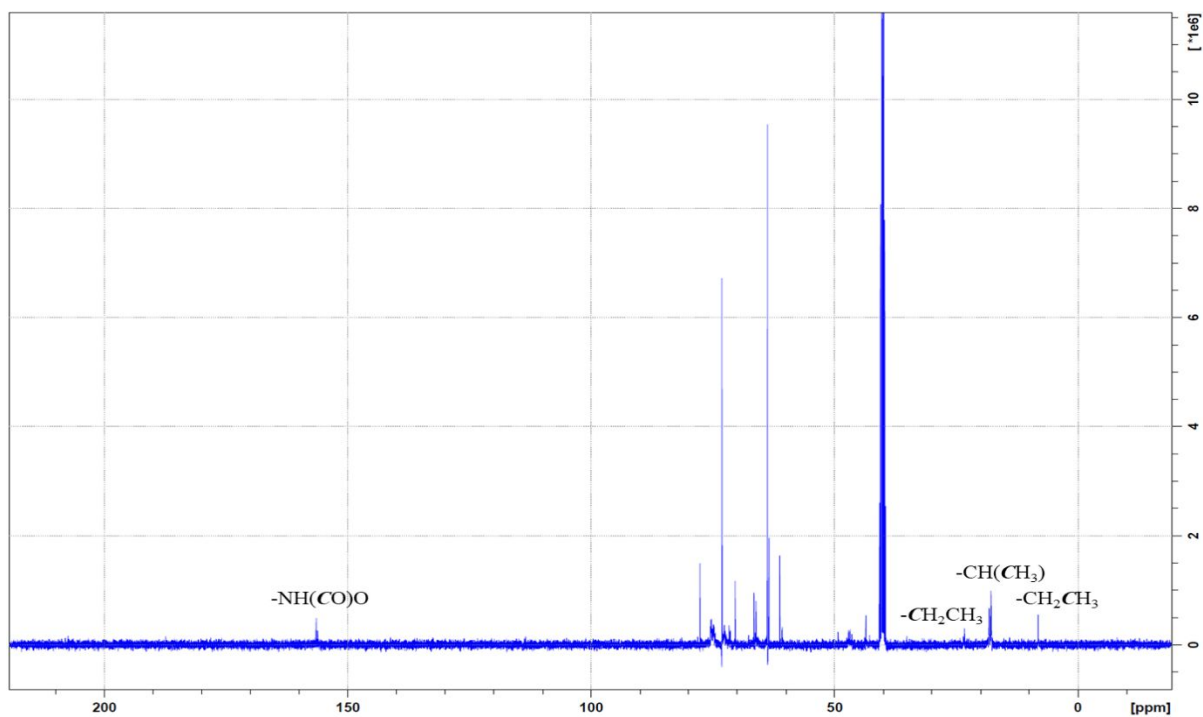

**Figure S4.** A  $^{13}\text{C}$ -NMR spectrum of oligomer MA-1 in  $\text{DMSO-}d_6$ .

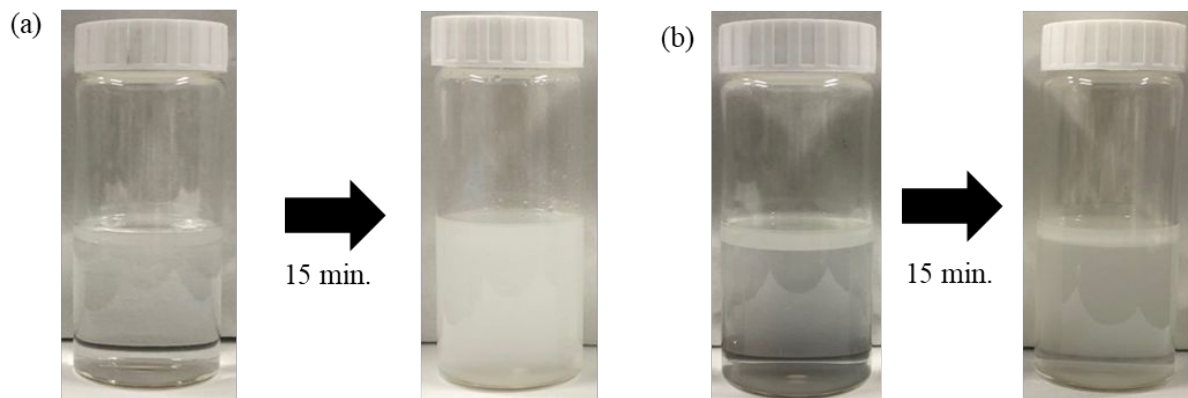

**Figure S5.** Toluene/water bilayers (a) with and (b) without oligomer MA-1 15 min after mixing.

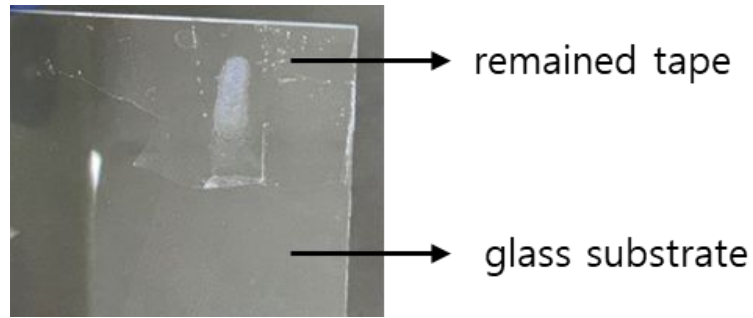

**Figure S6.** Remainers after detachment of the PSA-0 tape from a glass substrate.

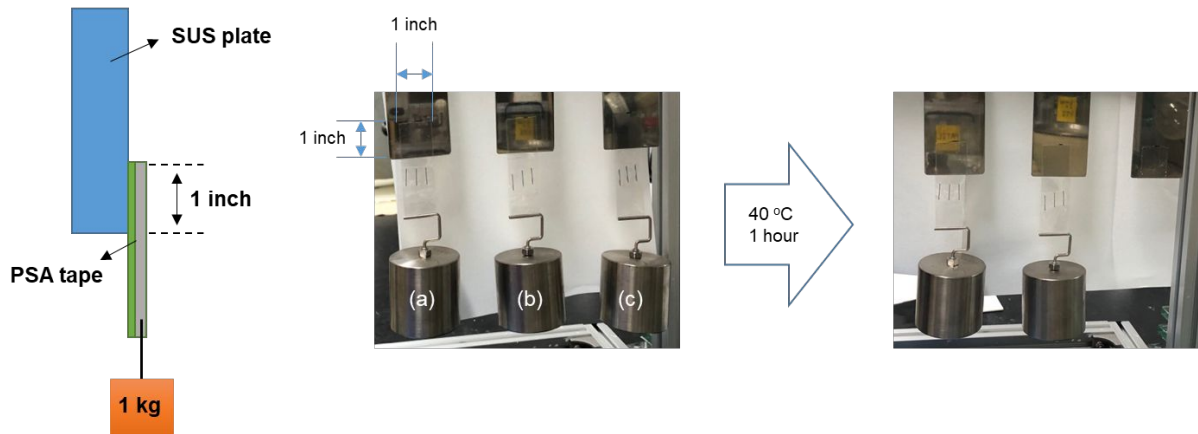

**Figure S7.** The shear resistance test of (a) PSA-0, (b) PSA-1 and (c) PSA-2 tapes. The weight with 1 kg was hung to the PSA tapes adhered to a SUS plate in a dimension of 1 inch by 1 inch, which kept in 40 °C for 1 h. While the time to shear failure for the PSA-0 and PSA-1 tapes exceeded 1 h ( $t > 1$  h), that for the PSA-2 tape was 15 min ( $t = 15$  min).

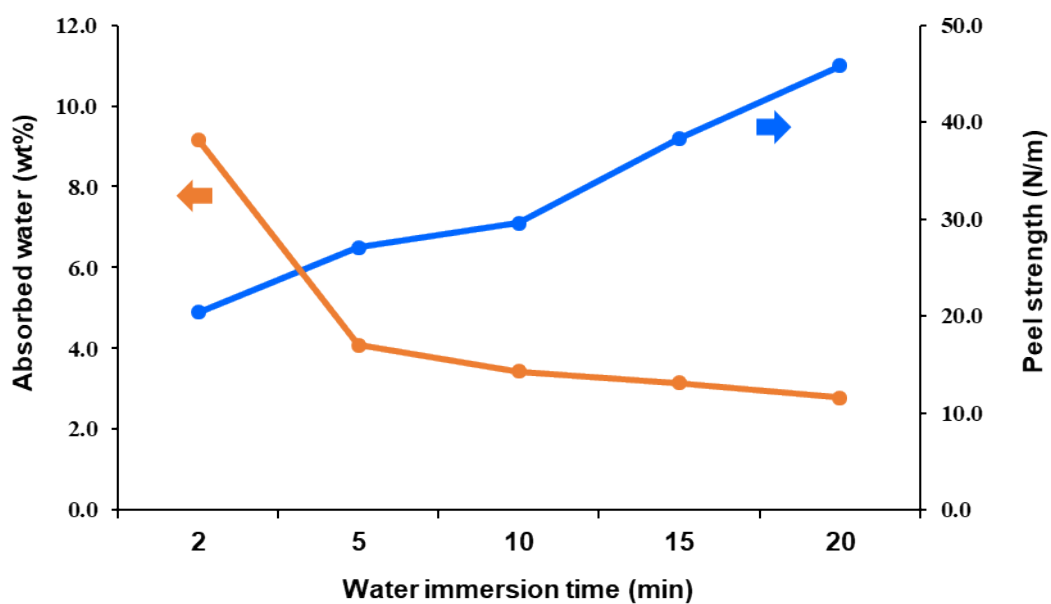

**Figure S8.** The weight percentage of the absorbed water in wr-PSA and the peel strength of wr-PSA over water immersion time at 25 °C.

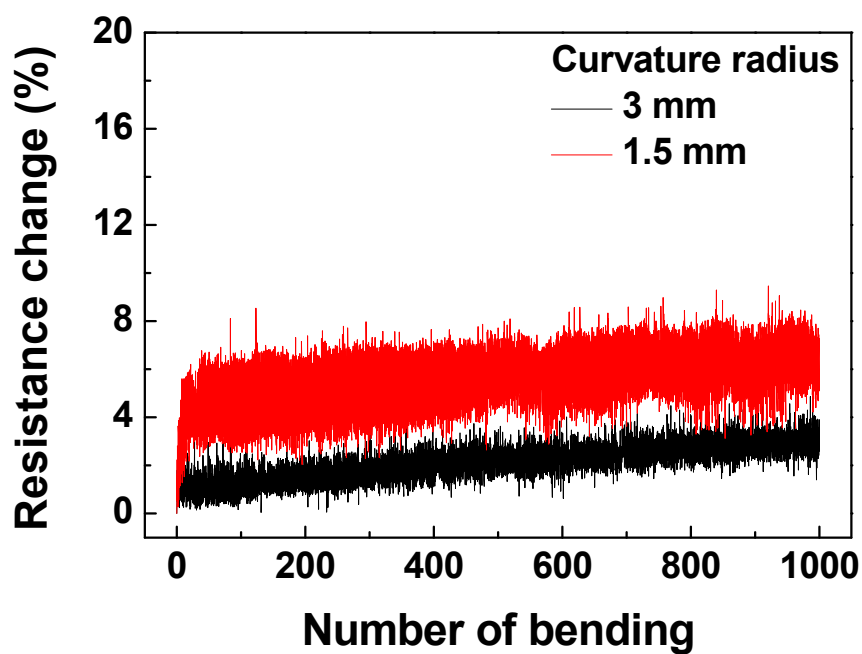

**Figure S9.** Resistance change of the AgNWs/1.4- $\mu$ m-thick PET electrode with the bending numbers employing bending radii of 1.5 and 3 mm.

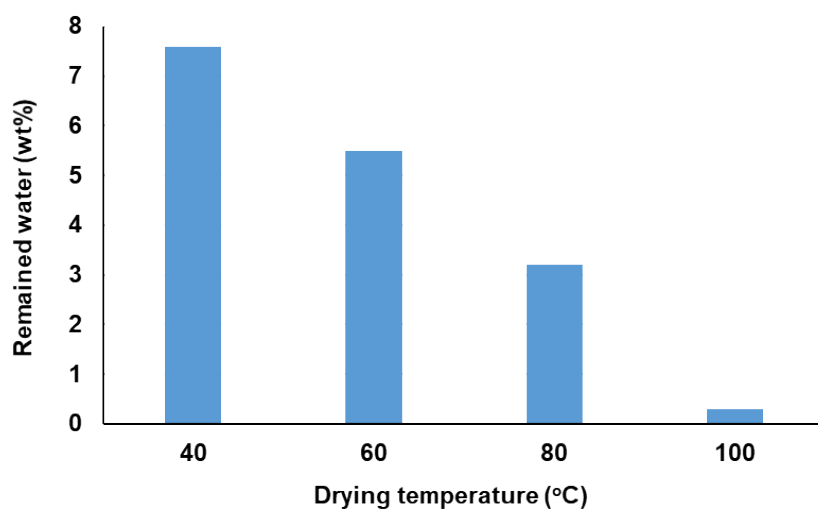

**Figure S10.** The weight percentage of the remained water in PSA-1 after drying at 40 °C, 60 °C, 80 °C and 100 °C.

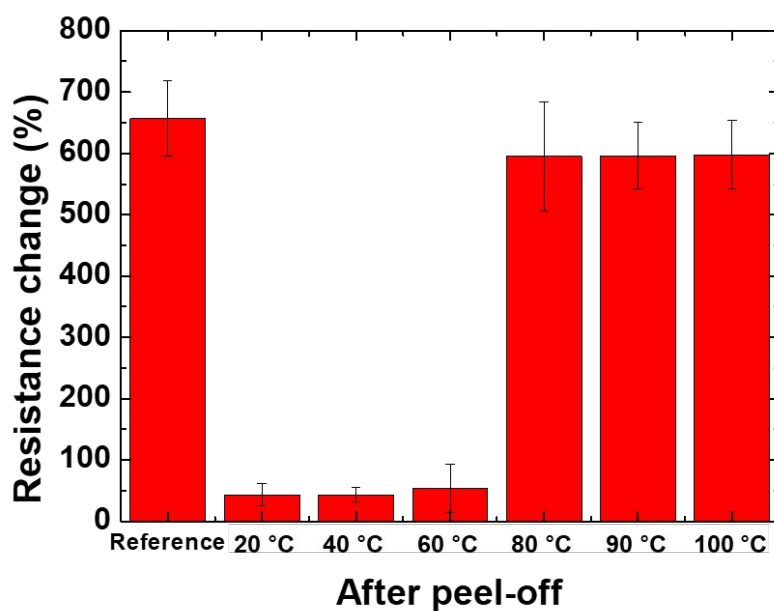

**Figure S11.** Resistance change of the water-treated AgNWs/1.4-μm-thick PET electrodes upon peeling-off after maintaining at various temperatures for 20 min. The reference refers to samples that did not experience water treatment and drying at high temperatures.
